# Supplementary material for: Increased Expression of SRSF1 Predicts Poor Prognosis in Multiple Myeloma
Source: Hindawi journal article supplement (doi:10.1155/2023/9998927), 2023-05-10
Supplement: f1 [file 9998927.f1.pdf]

**Supplemental Table 1.** Differential expressed genes between the SRSF1<sup>high</sup> and the SRSF1<sup>low</sup> groups.

| Gene          | log <sub>2</sub> FC | t       | P-Value  | adj.P-Value |
|---------------|---------------------|---------|----------|-------------|
| MIR142        | 0.74055             | 6.55985 | 1.22E-10 | 6.47E-08    |
| AC004941.5    | 0.71396             | 5.83016 | 9.35E-09 | 2.07E-06    |
| INHBE         | 0.69739             | 3.88298 | 0.000115 | 0.003023    |
| LINC01021     | 0.67628             | 4.57487 | 5.87E-06 | 0.000333    |
| LOC100129917  | 0.66612             | 5.16442 | 3.35E-07 | 3.68E-05    |
| EIF3C         | 0.66368             | 6.92083 | 1.23E-11 | 1.11E-08    |
| SLC20A1       | 0.65201             | 6.65325 | 6.82E-11 | 4.10E-08    |
| EMC3-AS1      | 0.64659             | 5.55547 | 4.28E-08 | 7.08E-06    |
| LOC100134822  | 0.64512             | 5.42139 | 8.80E-08 | 1.25E-05    |
| BC045784      | 0.62852             | 4.7656  | 2.40E-06 | 0.000167    |
| LINC00328     | 0.6192              | 4.91313 | 1.18E-06 | 9.81E-05    |
| HJURP         | 0.61576             | 5.21213 | 2.63E-07 | 3.14E-05    |
| CTB-181H17.1  | 0.61253             | 6.11972 | 1.76E-09 | 5.52E-07    |
| KIF21B        | 0.6001              | 4.01938 | 6.63E-05 | 0.002054    |
| SKA1          | 0.59651             | 4.7375  | 2.74E-06 | 0.000182    |
| RP11-480A16.1 | 0.57599             | 5.20026 | 2.79E-07 | 3.23E-05    |
| RP1-102H19.8  | 0.5723              | 4.92855 | 1.09E-06 | 9.38E-05    |
| RP11-124L9.5  | 0.5652              | 4.80539 | 1.99E-06 | 0.000147    |
| TACC3         | 0.5644              | 4.87487 | 1.42E-06 | 0.000113    |
| ZNF559        | 0.55644             | 3.62061 | 0.000321 | 0.00628     |
| LOC100132352  | 0.55318             | 5.06205 | 5.63E-07 | 5.62E-05    |
| HPDL          | 0.55125             | 4.56823 | 6.05E-06 | 0.000337    |
| CRIM1         | 0.54821             | 2.97252 | 0.00308  | 0.031927    |
| FOXM1         | 0.54518             | 4.02271 | 6.54E-05 | 0.002038    |
| ZNF569        | 0.54448             | 4.43914 | 1.09E-05 | 0.000526    |
| AZGP1         | 0.5317              | 2.80017 | 0.005284 | 0.046137    |
| SCN3A         | 0.53159             | 2.29829 | 0.021912 | 0.120784    |
| ZFP30         | 0.52842             | 3.32282 | 0.000949 | 0.013871    |
| SNORA21       | 0.52295             | 5.67914 | 2.17E-08 | 3.98E-06    |
| C1orf112      | 0.52197             | 4.07003 | 5.38E-05 | 0.001766    |
| PHF19         | 0.52042             | 5.46346 | 7.03E-08 | 1.04E-05    |
| LOC100134445  | 0.51943             | 6.99161 | 7.75E-12 | 8.39E-09    |
| RPL36A        | 0.51435             | 6.08822 | 2.12E-09 | 6.55E-07    |
| AGAP4         | 0.51404             | 7.49845 | 2.54E-13 | 6.77E-10    |
| ASPM          | 0.51127             | 5.75884 | 1.40E-08 | 2.82E-06    |
| PXMP2         | 0.5109              | 5.20781 | 2.69E-07 | 3.16E-05    |
| TOP2A         | 0.50888             | 5.13185 | 3.96E-07 | 4.20E-05    |
| ANKLE1        | 0.50671             | 4.41759 | 1.20E-05 | 0.000564    |
| CENPM         | 0.5035              | 3.95649 | 8.58E-05 | 0.002454    |
| RRN3P2        | 0.50224             | 4.31802 | 1.86E-05 | 0.000792    |
| RRM2          | 0.50115             | 4.58102 | 5.71E-06 | 0.000326    |
| LOC100271840  | 0.49762             | 3.9203  | 9.94E-05 | 0.002737    |
| NUF2          | 0.49539             | 4.16191 | 3.65E-05 | 0.001322    |

|               |         |         |          |          |
|---------------|---------|---------|----------|----------|
| HIST1H2AM     | 0.49446 | 3.77678 | 0.000176 | 0.004116 |
| AF090939      | 0.49191 | 5.24165 | 2.26E-07 | 2.73E-05 |
| BC032415      | 0.4909  | 5.44446 | 7.78E-08 | 1.14E-05 |
| POLE2         | 0.48906 | 4.48479 | 8.86E-06 | 0.000449 |
| BC022892      | 0.48599 | 4.57397 | 5.89E-06 | 0.000333 |
| NOMO3         | 0.48546 | 5.19243 | 2.91E-07 | 3.30E-05 |
| NVL           | 0.48294 | 3.71246 | 0.000226 | 0.004957 |
| MGC12488      | 0.48066 | 3.71698 | 0.000222 | 0.004896 |
| KIF14         | 0.47538 | 5.69028 | 2.04E-08 | 3.82E-06 |
| C1orf106      | 0.47316 | 3.48509 | 0.00053  | 0.009198 |
| PMS2P5        | 0.47162 | 7.02739 | 6.12E-12 | 6.98E-09 |
| NCAPH         | 0.47161 | 3.91704 | 0.000101 | 0.002751 |
| DTL           | 0.46913 | 5.31762 | 1.52E-07 | 1.95E-05 |
| LOC101060510  | 0.46619 | 3.81719 | 0.00015  | 0.003653 |
| NOTCH2NL      | 0.46593 | 3.96583 | 8.26E-05 | 0.0024   |
| LOC285812     | 0.46504 | 5.27903 | 1.86E-07 | 2.28E-05 |
| HNRNPU-AS1    | 0.4624  | 7.03058 | 6.00E-12 | 6.98E-09 |
| AP000347.2    | 0.4573  | 4.73057 | 2.84E-06 | 0.000186 |
| RP11-50B3.4   | 0.45658 | 6.35483 | 4.32E-10 | 1.70E-07 |
| LINC01410     | 0.4558  | 4.85368 | 1.57E-06 | 0.000124 |
| CENPK         | 0.45544 | 4.41397 | 1.22E-05 | 0.000569 |
| STK11IP       | 0.4513  | 4.335   | 1.73E-05 | 0.000744 |
| SHCBP1        | 0.45058 | 4.07536 | 5.26E-05 | 0.001743 |
| ANKRD36B      | 0.45029 | 5.65127 | 2.54E-08 | 4.46E-06 |
| ANKRD36C      | 0.44966 | 5.47547 | 6.59E-08 | 1.00E-05 |
| AF131215.4    | 0.44867 | 3.75125 | 0.000194 | 0.004441 |
| LOC100505874  | 0.44667 | 3.73932 | 0.000203 | 0.004579 |
| GIN51         | 0.44436 | 4.75505 | 2.53E-06 | 0.000173 |
| STC2          | 0.44394 | 4.96927 | 8.94E-07 | 8.17E-05 |
| RP3-428L16.2  | 0.44273 | 3.44502 | 0.000614 | 0.010198 |
| KIF4A         | 0.44229 | 4.02934 | 6.36E-05 | 0.001993 |
| BC030152      | 0.44164 | 4.90168 | 1.25E-06 | 0.000102 |
| ARF1          | 0.44065 | 4.17471 | 3.46E-05 | 0.001273 |
| CTAG2         | 0.43857 | 3.48997 | 0.000521 | 0.009081 |
| LOC101928700  | 0.43835 | 4.09683 | 4.81E-05 | 0.001636 |
| LOC399491     | 0.43823 | 4.7415  | 2.69E-06 | 0.000181 |
| RP11-803D5.4  | 0.43738 | 4.11082 | 4.53E-05 | 0.00156  |
| LOC81691      | 0.43607 | 5.38268 | 1.08E-07 | 1.47E-05 |
| KIF20A        | 0.43362 | 3.86417 | 0.000124 | 0.003213 |
| RP11-271C24.3 | 0.43359 | 7.59838 | 1.26E-13 | 3.91E-10 |
| AK025288      | 0.43302 | 4.63303 | 4.48E-06 | 0.000271 |
| MYBL2         | 0.43271 | 3.2039  | 0.001433 | 0.018756 |
| CLTC-IT1      | 0.42904 | 4.38827 | 1.37E-05 | 0.00062  |
| LINC00403     | 0.42648 | 2.68748 | 0.007413 | 0.058452 |
| LOC101927709  | 0.42513 | 2.98738 | 0.002937 | 0.030882 |
| NLRC3         | 0.42373 | 2.96075 | 0.003199 | 0.032859 |
| LOC101929004  | 0.42367 | 3.84815 | 0.000133 | 0.003376 |

|               |         |         |          |          |
|---------------|---------|---------|----------|----------|
| RP5-1074L1.4  | 0.42367 | 6.15173 | 1.46E-09 | 4.71E-07 |
| C3orf67       | 0.42361 | 3.0824  | 0.002154 | 0.024797 |
| LOC100190986  | 0.4207  | 6.26391 | 7.48E-10 | 2.70E-07 |
| LOC101928433  | 0.41937 | 2.81702 | 0.005018 | 0.044545 |
| LOC284513     | 0.41641 | 6.02672 | 3.03E-09 | 8.75E-07 |
| LRRC69        | 0.41549 | 4.56722 | 6.08E-06 | 0.000337 |
| LOC145474     | 0.41518 | 3.43053 | 0.000647 | 0.01056  |
| LOC100272216  | 0.41517 | 6.69007 | 5.41E-11 | 3.35E-08 |
| RP11-138A9.1  | 0.41346 | 5.94256 | 4.93E-09 | 1.21E-06 |
| BD495725      | 0.41196 | 3.92808 | 9.63E-05 | 0.00268  |
| RP3-508I15.21 | 0.4118  | 3.79915 | 0.000161 | 0.003863 |
| MIR34A        | 0.41049 | 3.14363 | 0.001757 | 0.021484 |
| LOC102723721  | 0.41042 | 4.34998 | 1.62E-05 | 0.000712 |
| FTX           | 0.41026 | 4.38485 | 1.39E-05 | 0.000625 |
| STAG3L3       | 0.40779 | 5.13886 | 3.82E-07 | 4.10E-05 |
| MSH2          | 0.40767 | 5.42739 | 8.52E-08 | 1.23E-05 |
| DSCR8         | 0.40742 | 2.78614 | 0.005514 | 0.047626 |
| SMAD1         | 0.40697 | 2.1019  | 0.036007 | 0.167732 |
| ANKS3         | 0.4069  | 3.65711 | 0.000279 | 0.005715 |
| LOC101929964  | 0.40653 | 4.09331 | 4.88E-05 | 0.001647 |
| CCAR1         | 0.40531 | 7.71115 | 5.71E-14 | 2.06E-10 |
| E2F8          | 0.40378 | 4.64554 | 4.23E-06 | 0.000257 |
| SND1-IT1      | 0.40324 | 5.52618 | 5.02E-08 | 8.05E-06 |
| ARHGEF1       | 0.40322 | 3.96778 | 8.20E-05 | 0.002385 |
| LOC101927330  | 0.40192 | 3.5544  | 0.000411 | 0.007537 |
| PFAS          | 0.40148 | 6.46513 | 2.20E-10 | 1.01E-07 |
| ZNF692        | 0.4011  | 8.39844 | 3.71E-16 | 2.68E-12 |
| HK2           | 0.40088 | 2.31511 | 0.020967 | 0.11728  |
| AP001462.6    | 0.40059 | 3.46185 | 0.000577 | 0.009766 |
| ASZ1          | 0.40037 | 3.19025 | 0.001501 | 0.019283 |
| ZNF76         | 0.39967 | 3.9314  | 9.50E-05 | 0.002654 |
| MAGEB18       | 0.39925 | 2.53127 | 0.011637 | 0.078887 |
| NEK2          | 0.39879 | 4.29707 | 2.04E-05 | 0.000853 |
| PLK4          | 0.39839 | 4.23606 | 2.66E-05 | 0.001041 |
| KCNK12        | 0.39823 | 2.82275 | 0.00493  | 0.043991 |
| ZNF883        | 0.39805 | 3.62358 | 0.000317 | 0.006217 |
| PMS2L2        | 0.39725 | 3.97289 | 8.03E-05 | 0.002355 |
| AGAP9         | 0.3972  | 4.14579 | 3.91E-05 | 0.001392 |
| AX747652      | 0.39688 | 3.55886 | 0.000404 | 0.007451 |
| PBK           | 0.39663 | 4.3019  | 2.00E-05 | 0.000841 |
| HTR2C         | 0.39626 | 3.83169 | 0.000142 | 0.003502 |
| MED6          | 0.39465 | 6.01636 | 3.22E-09 | 9.05E-07 |
| SEC14L1P1     | 0.39337 | 3.60852 | 0.000335 | 0.006497 |
| UHRF1         | 0.39308 | 3.56242 | 0.000399 | 0.007378 |
| NUDT9P1       | 0.39258 | 3.9952  | 7.33E-05 | 0.002206 |
| ANKZF1        | 0.39087 | 3.94122 | 9.13E-05 | 0.002581 |

|                       |          |          |          |          |
|-----------------------|----------|----------|----------|----------|
| LL22NC03-<br>N14H11.1 | 0.39082  | 3.3983   | 0.000726 | 0.011481 |
| BRIP1                 | 0.38982  | 4.18723  | 3.28E-05 | 0.00122  |
| HIST1H4J              | 0.38845  | 3.09707  | 0.002052 | 0.023989 |
| STAM-AS1              | 0.38844  | 3.45385  | 0.000594 | 0.009984 |
| C10orf40              | 0.38805  | 3.02421  | 0.002607 | 0.028561 |
| BUB1B                 | 0.3878   | 4.30258  | 1.99E-05 | 0.000841 |
| MEST                  | 0.38774  | 4.02649  | 6.44E-05 | 0.002012 |
| DEPDC1B               | 0.3876   | 3.41309  | 0.000689 | 0.010996 |
| RPS16P5               | 0.38682  | 3.43761  | 0.00063  | 0.010387 |
| SSX1                  | 0.38611  | 3.15723  | 0.001678 | 0.020753 |
| TCERG1                | 0.38583  | 6.97119  | 8.86E-12 | 9.13E-09 |
| PKD1P1                | 0.38567  | 3.6604   | 0.000276 | 0.005678 |
| BC042590              | 0.38554  | 3.43909  | 0.000627 | 0.010352 |
| TENM2                 | 0.38445  | 3.39207  | 0.000743 | 0.011659 |
| MINOS1P1              | 0.38425  | 4.28948  | 2.11E-05 | 0.000871 |
| D2HGDH                | 0.38211  | 3.99538  | 7.32E-05 | 0.002206 |
| FLJ41455              | 0.38199  | 3.09084  | 0.002095 | 0.024321 |
| GTF2H2B               | 0.38144  | 6.04721  | 2.69E-09 | 7.98E-07 |
| TOX2                  | 0.38143  | 2.2953   | 0.022084 | 0.121268 |
| BTBD18                | 0.38056  | 3.82717  | 0.000144 | 0.003541 |
| LOC101927196          | 0.37979  | 3.1046   | 0.002001 | 0.023616 |
| OIP5                  | 0.37934  | 3.97103  | 8.09E-05 | 0.002366 |
| CKAP2L                | 0.37932  | 3.65747  | 0.000279 | 0.005715 |
| UBE2T                 | 0.37834  | 4.22167  | 2.83E-05 | 0.001088 |
| HELLS                 | 0.37828  | 5.80532  | 1.08E-08 | 2.26E-06 |
| SPC25                 | 0.37807  | 4.20047  | 3.10E-05 | 0.001162 |
| GSTP1                 | -0.37881 | -4.31644 | 1.87E-05 | 0.000796 |
| C10orf10              | -0.37929 | -2.71364 | 0.006859 | 0.055438 |
| APOC1                 | -0.38108 | -3.02408 | 0.002608 | 0.028561 |
| CTC-360P9.3           | -0.38133 | -4.10216 | 4.70E-05 | 0.001605 |
| CSF2RB                | -0.38217 | -3.04603 | 0.002428 | 0.027222 |
| CYP26A1               | -0.38227 | -3.29577 | 0.001043 | 0.014882 |
| LOC101929272          | -0.38231 | -3.62774 | 0.000312 | 0.006135 |
| ST6GALNAC6            | -0.38417 | -3.31717 | 0.000968 | 0.014088 |
| TNFSF8                | -0.38492 | -2.74531 | 0.006239 | 0.051898 |
| RGS2                  | -0.38503 | -3.18648 | 0.00152  | 0.019445 |
| NCF4                  | -0.38933 | -4.96116 | 9.30E-07 | 8.36E-05 |
| LOC101928612          | -0.39003 | -3.8364  | 0.000139 | 0.003476 |
| MAFB                  | -0.39134 | -2.72661 | 0.006599 | 0.053855 |
| ACP5                  | -0.39198 | -3.72329 | 0.000216 | 0.004824 |
| MARCKS                | -0.39241 | -3.46222 | 0.000577 | 0.009764 |
| TNFSF10               | -0.39277 | -3.16651 | 0.001627 | 0.020381 |
| NFKBIE                | -0.3949  | -4.3929  | 1.34E-05 | 0.000612 |
| RNASE3                | -0.39611 | -2.74541 | 0.006237 | 0.051898 |
| CTSH                  | -0.3966  | -2.57015 | 0.010422 | 0.073818 |
| ABCG2                 | -0.39737 | -2.82498 | 0.004897 | 0.043864 |

|              |          |          |          |          |
|--------------|----------|----------|----------|----------|
| SPNS3        | -0.39748 | -2.50982 | 0.012359 | 0.082063 |
| UBE2QL1      | -0.39831 | -2.87436 | 0.004202 | 0.039282 |
| RALYL        | -0.40002 | -2.39965 | 0.016736 | 0.100071 |
| LOC100996425 | -0.4001  | -4.23795 | 2.64E-05 | 0.001034 |
| LILRB5       | -0.40316 | -2.99682 | 0.002849 | 0.030295 |
| FKBP1B       | -0.40479 | -3.50457 | 0.000494 | 0.008722 |
| ZC3H12D      | -0.40594 | -2.87753 | 0.004161 | 0.039015 |
| LOC101929143 | -0.40688 | -3.50752 | 0.000489 | 0.008656 |
| MANSC1       | -0.40717 | -3.49664 | 0.000508 | 0.008906 |
| CCR5         | -0.40724 | -2.41494 | 0.016056 | 0.097109 |
| HOXC9        | -0.40784 | -3.72327 | 0.000217 | 0.004824 |
| LOC100131662 | -0.40916 | -3.02879 | 0.002568 | 0.028285 |
| CEACAM8      | -0.40918 | -2.76969 | 0.005797 | 0.049219 |
| HMOX1        | -0.41236 | -2.95797 | 0.003227 | 0.033006 |
| ELANE        | -0.41244 | -3.14164 | 0.001769 | 0.021611 |
| FGF2         | -0.41385 | -3.67716 | 0.000259 | 0.005403 |
| STAP1        | -0.41388 | -3.55654 | 0.000408 | 0.007497 |
| SELM         | -0.41593 | -4.78862 | 2.15E-06 | 0.000154 |
| EPX          | -0.4161  | -3.35863 | 0.000836 | 0.012694 |
| PLBD1        | -0.41782 | -3.47443 | 0.000551 | 0.009455 |
| IGHM         | -0.41997 | -3.06435 | 0.002286 | 0.025999 |
| BC034416     | -0.42158 | -3.97991 | 7.80E-05 | 0.002301 |
| GADD45A      | -0.42177 | -4.05066 | 5.83E-05 | 0.001874 |
| TRPM4        | -0.42324 | -2.18126 | 0.029578 | 0.147666 |
| IL18         | -0.42679 | -3.054   | 0.002365 | 0.026628 |
| TMEM56       | -0.43008 | -3.99951 | 7.20E-05 | 0.002186 |
| NOL4         | -0.4301  | -2.56508 | 0.010574 | 0.074479 |
| P2RY6        | -0.43116 | -2.91405 | 0.00371  | 0.036298 |
| SYNE4        | -0.43133 | -4.37416 | 1.45E-05 | 0.000652 |
| CD74         | -0.43656 | -6.25883 | 7.71E-10 | 2.74E-07 |
| SLC46A3      | -0.43712 | -3.39743 | 0.000728 | 0.011487 |
| DCLK1        | -0.43979 | -3.10128 | 0.002024 | 0.023799 |
| CXCL12       | -0.44077 | -3.78412 | 0.000171 | 0.004029 |
| LAMP3        | -0.44171 | -4.49619 | 8.41E-06 | 0.000433 |
| CD14         | -0.44292 | -2.9662  | 0.003143 | 0.032394 |
| GLCE         | -0.44334 | -4.56923 | 6.02E-06 | 0.000337 |
| PPAP2C       | -0.44344 | -2.13713 | 0.033019 | 0.158471 |
| UNC119       | -0.44425 | -4.67446 | 3.69E-06 | 0.000232 |
| TMEM45A      | -0.4472  | -4.12678 | 4.24E-05 | 0.001484 |
| LOC102724362 | -0.45085 | -3.93395 | 9.40E-05 | 0.002636 |
| RASGRP1      | -0.454   | -2.11701 | 0.034698 | 0.163858 |
| PLA2G2D      | -0.45606 | -4.42679 | 1.15E-05 | 0.000548 |
| NR3C2        | -0.45668 | -3.65703 | 0.000279 | 0.005715 |
| MPEG1        | -0.45832 | -4.01963 | 6.62E-05 | 0.002054 |
| PRR15        | -0.45923 | -2.31051 | 0.021222 | 0.118099 |
| TUBB2A       | -0.4608  | -3.27971 | 0.001104 | 0.015475 |
| CPQ          | -0.46137 | -5.46622 | 6.93E-08 | 1.03E-05 |

|              |          |          |          |          |
|--------------|----------|----------|----------|----------|
| PPBP         | -0.46141 | -2.43005 | 0.015409 | 0.094838 |
| AMIGO2       | -0.46292 | -3.84546 | 0.000134 | 0.0034   |
| SCGB1A1      | -0.46318 | -4.21209 | 2.95E-05 | 0.001121 |
| LINC00324    | -0.46456 | -4.93186 | 1.07E-06 | 9.27E-05 |
| DPEP1        | -0.46514 | -2.96105 | 0.003196 | 0.032854 |
| LOC100996286 | -0.46537 | -4.56974 | 6.01E-06 | 0.000337 |
| TMCO2        | -0.46589 | -4.24909 | 2.51E-05 | 0.000992 |
| LAG3         | -0.46687 | -2.87224 | 0.00423  | 0.039425 |
| CD163        | -0.46806 | -3.57634 | 0.000379 | 0.007096 |
| CCRL2        | -0.46905 | -3.28625 | 0.001079 | 0.015212 |
| NCF2         | -0.46936 | -3.07592 | 0.002201 | 0.025225 |
| SOX14        | -0.46967 | -4.15584 | 3.75E-05 | 0.001354 |
| LOC100507562 | -0.47165 | -4.05742 | 5.67E-05 | 0.001831 |
| CCL18        | -0.47636 | -3.5788  | 0.000375 | 0.007046 |
| TIMD4        | -0.47841 | -3.60055 | 0.000346 | 0.006665 |
| NOD2         | -0.47855 | -3.96403 | 8.32E-05 | 0.002409 |
| APOL3        | -0.48128 | -3.63606 | 0.000302 | 0.006036 |
| SIT1         | -0.4834  | -3.19078 | 0.001498 | 0.019263 |
| NXPE4        | -0.48907 | -4.41719 | 1.20E-05 | 0.000564 |
| GNG11        | -0.49098 | -3.93942 | 9.20E-05 | 0.002595 |
| C1QC         | -0.49297 | -3.08768 | 0.002117 | 0.024483 |
| PLEKHF1      | -0.49379 | -4.21889 | 2.86E-05 | 0.001093 |
| IGSF11       | -0.4948  | -3.73233 | 0.000209 | 0.00469  |
| IL18R1       | -0.49488 | -4.77634 | 2.28E-06 | 0.000161 |
| EYA2         | -0.49585 | -2.73222 | 0.006489 | 0.0532   |
| SYNGR3       | -0.49633 | -3.12896 | 0.001845 | 0.022264 |
| ADTRP        | -0.50134 | -4.56487 | 6.15E-06 | 0.000339 |
| GPHA2        | -0.50598 | -4.26091 | 2.39E-05 | 0.000956 |
| C11orf96     | -0.50907 | -2.68881 | 0.007384 | 0.058306 |
| CTGF         | -0.52266 | -2.32111 | 0.020638 | 0.116007 |
| IGK          | -0.52609 | -4.01027 | 6.89E-05 | 0.002115 |
| ATXN8OS      | -0.5283  | -4.09184 | 4.91E-05 | 0.001655 |
| PLAT         | -0.53034 | -4.46601 | 9.64E-06 | 0.000479 |
| SERPINI1     | -0.53343 | -4.46576 | 9.65E-06 | 0.000479 |
| ICAM4        | -0.53684 | -3.64503 | 0.000292 | 0.005902 |
| PTPRZ1       | -0.54619 | -2.89604 | 0.003926 | 0.037549 |
| PRG2         | -0.54916 | -3.13965 | 0.00178  | 0.021722 |
| MLIP         | -0.55058 | -3.68246 | 0.000253 | 0.005367 |
| ISL2         | -0.56446 | -2.4467  | 0.014723 | 0.091762 |
| CD5L         | -0.56763 | -4.83434 | 1.73E-06 | 0.000133 |
| HLA-DRA      | -0.57133 | -3.1602  | 0.001662 | 0.020641 |
| ELOVL7       | -0.57142 | -3.48718 | 0.000526 | 0.009139 |
| LOC100293211 | -0.5725  | -3.74848 | 0.000196 | 0.004466 |
| VCAM1        | -0.58662 | -3.85973 | 0.000127 | 0.003254 |
| C1QB         | -0.59581 | -3.70087 | 0.000236 | 0.005126 |
| IGHV3-54     | -0.60398 | -3.96556 | 8.27E-05 | 0.0024   |
| MAST1        | -0.60547 | -4.87717 | 1.40E-06 | 0.000113 |

|         |          |          |          |          |
|---------|----------|----------|----------|----------|
| CPVL    | -0.61265 | -3.8819  | 0.000116 | 0.003033 |
| QPCT    | -0.62142 | -3.67729 | 0.000258 | 0.005403 |
| SULF2   | -0.62303 | -3.18001 | 0.001554 | 0.019711 |
| PLEKHO1 | -0.654   | -3.82831 | 0.000144 | 0.00354  |
| BIRC3   | -0.65768 | -4.89198 | 1.31E-06 | 0.000106 |
| C1QA    | -0.6995  | -3.93926 | 9.20E-05 | 0.002595 |
| Igk     | -0.73808 | -5.35038 | 1.28E-07 | 1.68E-05 |
| GBA3    | -0.74999 | -4.64818 | 4.18E-06 | 0.000256 |
| CTSW    | -0.84207 | -3.97868 | 7.84E-05 | 0.002309 |
| KIT     | -0.991   | -4.46451 | 9.70E-06 | 0.000481 |

---

**Supplementary Table 2.** Top 20 terms of GO analysis of differential expressed genes.

| GO         | Description                                      | logP-Value | Z-score | Gene Number | Gene Count | Gene Ratio (%) |
|------------|--------------------------------------------------|------------|---------|-------------|------------|----------------|
| GO:0051301 | cell division                                    | -8.9       | 8.3     | 213         | 22         | 10             |
| GO:0006954 | inflammatory response                            | -6.9       | 6.8     | 213         | 22         | 10             |
| GO:0050778 | positive regulation of immune response           | -4.1       | 4.8     | 213         | 17         | 8              |
| GO:0007059 | chromosome segregation                           | -8.1       | 8.5     | 213         | 16         | 7.5            |
| GO:0002274 | myeloid leukocyte activation                     | -4.3       | 5       | 213         | 16         | 7.5            |
| GO:0002366 | leukocyte activation involved in immune response | -3.9       | 4.6     | 213         | 16         | 7.5            |
| GO:0002263 | cell activation involved in immune response      | -3.9       | 4.6     | 213         | 16         | 7.5            |
| GO:0046649 | lymphocyte activation                            | -3.7       | 4.4     | 213         | 16         | 7.5            |
| GO:0001817 | regulation of cytokine production                | -3.5       | 4.2     | 213         | 16         | 7.5            |
| GO:0002697 | regulation of immune effector process            | -5.5       | 6.2     | 213         | 15         | 7              |
| GO:0002250 | adaptive immune response                         | -3.4       | 4.2     | 213         | 15         | 7              |
| GO:0009617 | response to bacterium                            | -3.3       | 4.1     | 213         | 15         | 7              |
| GO:0051345 | positive regulation of hydrolase activity        | -3         | 3.8     | 213         | 15         | 7              |
| GO:0045055 | regulated exocytosis                             | -3         | 3.8     | 213         | 15         | 7              |
| GO:0045859 | regulation of protein kinase activity            | -2.9       | 3.7     | 213         | 15         | 7              |
| GO:0000280 | nuclear division                                 | -5.1       | 5.9     | 213         | 14         | 6.6            |
| GO:0048285 | organelle fission                                | -4.6       | 5.4     | 213         | 14         | 6.6            |
| GO:0050900 | leukocyte migration                              | -4.4       | 5.2     | 213         | 14         | 6.6            |
| GO:0002694 | regulation of leukocyte activation               | -3.7       | 4.6     | 213         | 14         | 6.6            |
| GO:0000226 | microtubule cytoskeleton organization            | -3.6       | 4.4     | 213         | 14         | 6.6            |



**Supplementary Table 3.** Top 20 terms of KEGG pathway analysis of differential expressed genes.

| KEGG pathway | Description                             | LogP-Value | Z-score | Gene Number | Gene Count | Gene Ratio (%) |
|--------------|-----------------------------------------|------------|---------|-------------|------------|----------------|
| hsa04060     | Cytokine-cytokine receptor interaction  | -3         | 4.2     | 213         | 8          | 3.8            |
| hsa05322     | Systemic lupus erythematosus            | -4.1       | 6       | 213         | 7          | 3.3            |
| hsa05202     | Transcriptional misregulation in cancer | -2.3       | 3.6     | 213         | 6          | 2.8            |
| hsa04610     | Complement and coagulation cascades     | -3.5       | 5.7     | 213         | 5          | 2.3            |
| hsa04210     | Apoptosis                               | -2.4       | 3.9     | 213         | 5          | 2.3            |
| hsa05418     | Fluid shear stress and atherosclerosis  | -2.3       | 3.7     | 213         | 5          | 2.3            |
| hsa04145     | Phagosome                               | -2         | 3.3     | 213         | 5          | 2.3            |
| hsa05321     | Inflammatory bowel disease (IBD)        | -2.8       | 4.9     | 213         | 4          | 1.9            |
| hsa01524     | Platinum drug resistance                | -2.6       | 4.7     | 213         | 4          | 1.9            |
| hsa05150     | Staphylococcus aureus infection         | -2.5       | 4.4     | 213         | 4          | 1.9            |
| hsa05133     | Pertussis                               | -2.5       | 4.4     | 213         | 4          | 1.9            |
| hsa05323     | Rheumatoid arthritis                    | -2.2       | 3.8     | 213         | 4          | 1.9            |
| hsa04064     | NF-kappa B signaling pathway            | -2         | 3.6     | 213         | 4          | 1.9            |
| ko04668      | TNF signaling pathway                   | -2         | 3.5     | 213         | 4          | 1.9            |
| hsa05310     | Asthma                                  | -2.8       | 5.7     | 213         | 3          | 1.4            |
| hsa05020     | Prion diseases                          | -2.6       | 5.3     | 213         | 3          | 1.4            |
| ko05134      | Legionellosis                           | -2.1       | 4       | 213         | 3          | 1.4            |

Amplification levels of 1q21 ■ 2 ■ 3 ■ 4+

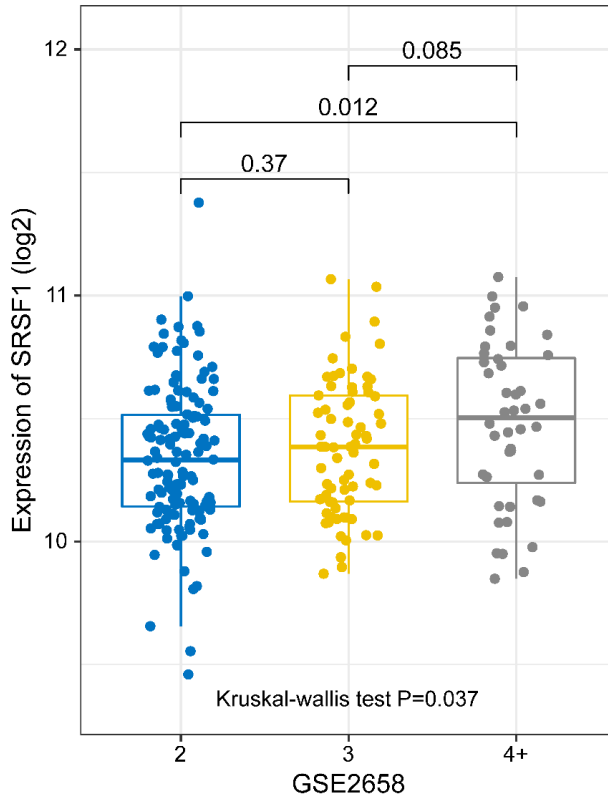

**Supplementary Figure 1.** SRSF1 expression levels at different 1q21 amplification in 248 MM patients of GSE2658.  $p = 0.037$ , Kruskal-wallis test.

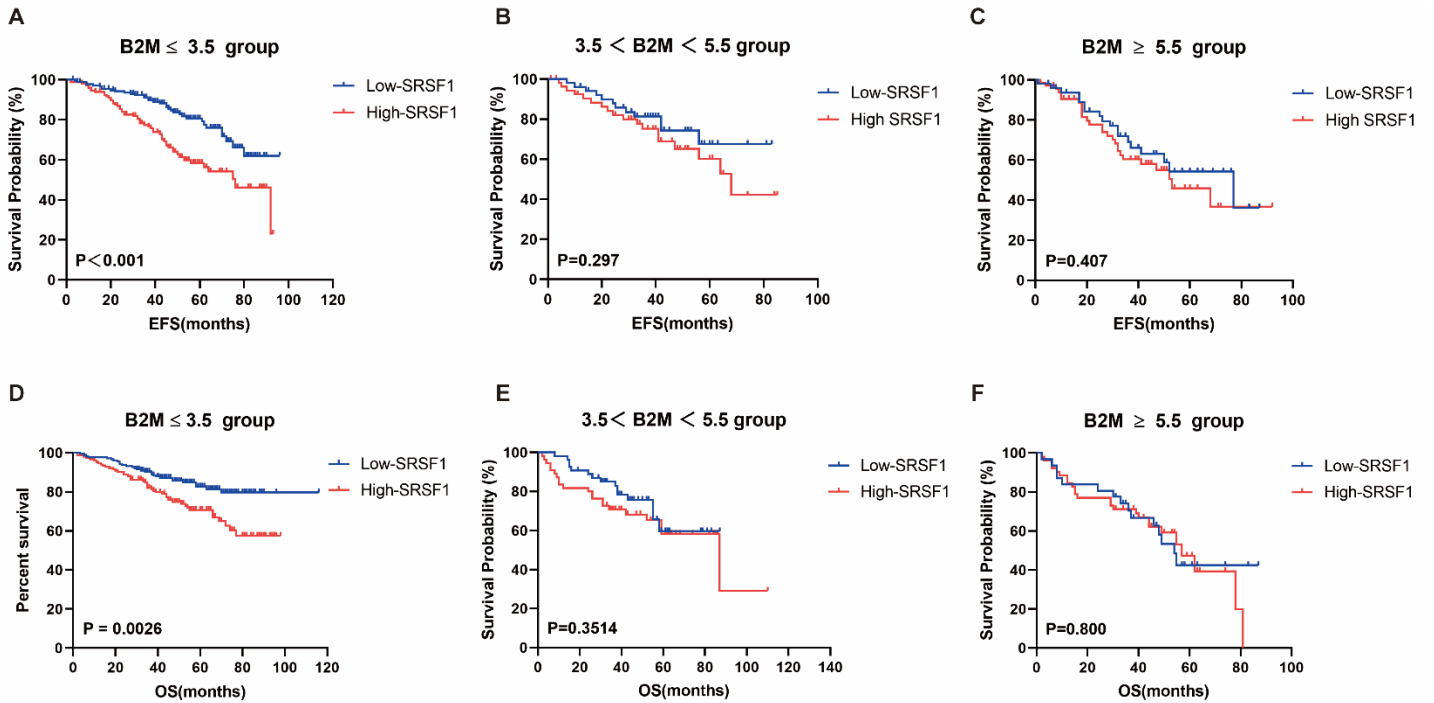

**Supplementary Figure 2.** The Kaplan-Meier curve shows the prognostic value of the SRSF1 expression levels for MM patients categorized by  $B2M \leq 3.5(\text{mg/l})$  (A, D),  $3.5 < B2M < 5.5(\text{mg/l})$  (B, E), and  $B2M \geq 5.5(\text{mg/l})$  (C, F). Abbreviation: B2M: beta-2 microglobulin; EFS: event free survival; OS: overall survival.

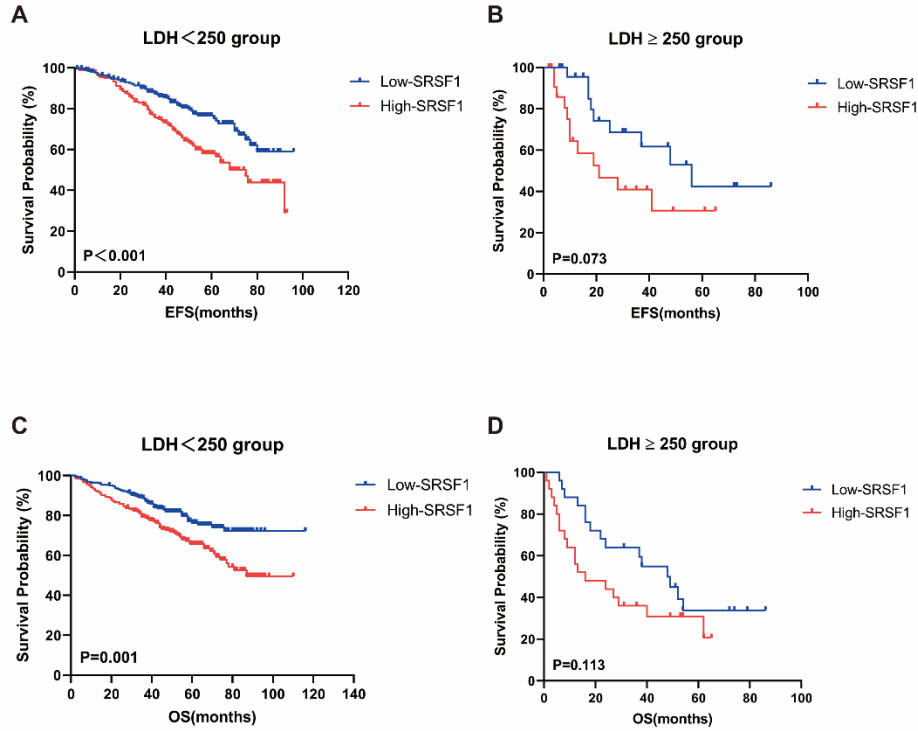

**Supplementary Figure 3.** The Kaplan-Meier curve shows the prognostic value of the SRSF1 expression levels for MM patients categorized by LDH < 250(U/l) (A, C) and LDH  $\geq 250(\text{U/l})$  (B, D). Abbreviation: LDH: lactate dehydrogenase; EFS: event free survival; OS: overall survival.

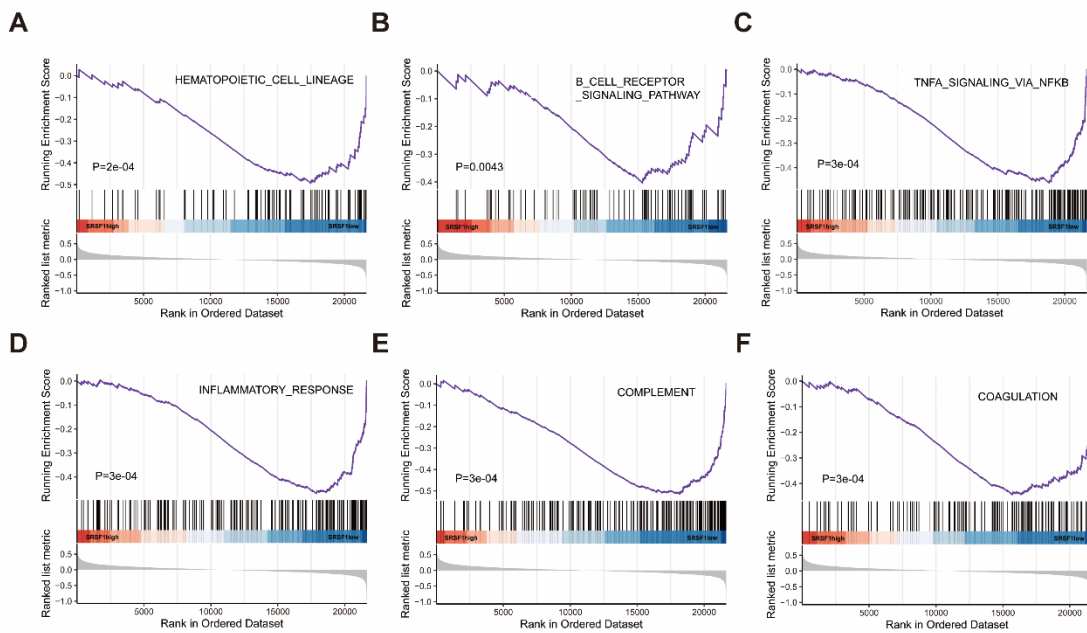

**Supplementary Figure 4.** GSEA showed that hematopoietic cell lineage(**A**), B cell receptor signaling pathway(**B**), TNF $\alpha$  signaling via NF $\kappa$ B(**C**), inflammatory response(**D**), complement(**E**), and coagulation(**F**) were significantly enriched in the SRSF1<sup>low</sup> group.
